# Supplementary material for: Psychiatrists effect on positive symptom severity and daily functioning during pharmacotherapy for first-episode psychosis patients
Source: PubMed Central journal article supplement — Sci Rep. 2024 Oct 2;14:22871. doi: 10.1038/s41598-024-72678-4 (PMC11447264; doi:10.1038/s41598-024-72678-4), 2024-10-02
Supplement: 41598_2024_72678_MOESM1_ESM.pdf [file 41598_2024_72678_MOESM1_ESM.pdf]

**Table S1**

*Main Linear Mixed-Effects Analyses of the Effect of Psychiatrists on Symptom Severity Measured with Positive And Negative Syndrome Scale (PANSS) Positive Subscale in First Episode Psychosis Patients*

| Model description <sup>a</sup>                                                         | AIC <sup>b</sup> | p-value  | R <sup>2</sup> <sub>marginal</sub> | R <sup>2</sup> <sub>marginal</sub> for psychiatrist as predictor per model |
|----------------------------------------------------------------------------------------|------------------|----------|------------------------------------|----------------------------------------------------------------------------|
| Model 1. PANSS positive scale ~ time + psychiatrists                                   | -3522.9          | 0.033*   | 0.092                              | 0.091                                                                      |
| Model 2. As model 1 + dose of antipsychotics                                           | -3527.2          | 0.012*   | 0.100                              | 0.090                                                                      |
| Model 3. As model 2 + interaction of psychiatrists by dose of antipsychotics           | -3521.2          | 0.046*   | 0.124                              | 0.068                                                                      |
| Model 4. As model 2 + type of antipsychotics                                           | -3522.1          | 0.835    | 0.099                              | 0.087                                                                      |
| Model 5. As model 2 + baseline severity                                                | -3729.7          | <.001*** | 0.485                              | 0.023                                                                      |
| Model 6. As model 5 + frequency of psychiatrist visits <sup>c</sup>                    | -3727.8          | 0.786    | 0.485                              | 0.023                                                                      |
| Model 7. As model 5 + treatment site                                                   | -3723.8          | 0.997    | 0.484                              | 0.001                                                                      |
| Model 8. As model 5 + years of education                                               | -3735.2          | 0.006**  | 0.493                              | 0.025                                                                      |
| Model 9. As model 8 + medication non-adherence <sup>d</sup>                            | -3734.7          | 0.218    | 0.494                              | 0.024                                                                      |
| Model 10. As model 8 + frequency of psychologist visits                                | -3738.7          | 0.019*   | 0.497                              | 0.025                                                                      |
| Model 11. As model 10 + frequency of nurse visits                                      | -3613.9          | 0.902    | 0.496                              | 0.025                                                                      |
| Model 12. PANSS positive scale ~ time + gender of the patient                          | -3532.5          | 0.010*   | 0.025                              | NA                                                                         |
| Model 13. As model 12 + gender of the psychiatrist                                     | -3532.6          | 0.147    | 0.032                              | NA                                                                         |
| Model 14. As model 13 + interaction between the gender of the patient and psychiatrist | -3531.4          | 0.361    | 0.034                              | NA                                                                         |
| Model 15. PANSS positive scale ~ time + education of the psychiatrist <sup>e</sup>     | -3525.9          | 0.941    | 0.001                              | NA                                                                         |

*Note.* A reciprocal transformation was applied to PANSS positive subscale scores to meet the normality and homogeneity assumptions.

<sup>a</sup> Model comparison was performed by comparing the model including the last predictor, defined in the model definition, with the model excluding the last predictor.

<sup>b</sup> AIC: Akaike information criterion.

<sup>c</sup> The frequency by which patients had contact with their psychiatrist in the month before the study assessment.

<sup>d</sup> Medication adherence was measured as the number of days the participant used less or no antipsychotic drugs while these had been prescribed, in the two weeks before the study assessment.

<sup>e</sup> Whether or not the psychiatrist had obtained a PhD.

**Table S2**

*Additional linear mixed-effects analyses of the effect of psychiatrists on daily functioning, measured with World Health Organization Disability Assessment Schedule (WHO-DAS) 2.0 total score in first episode psychosis patients*

| Model description <sup>a</sup>                                                  | AIC <sup>b</sup> | <i>p</i> -value | $\chi^2$ | $R^2_{\text{marginal}}$ | $R^2_{\text{marginal}}$ for psychiatrist as predictor per model |
|---------------------------------------------------------------------------------|------------------|-----------------|----------|-------------------------|-----------------------------------------------------------------|
| Model 1. WHO-DAS 2.0 total score ~ time + psychiatrists                         | 2570.2           | 0.011**         | 33.011   | 0.118                   | 0.101                                                           |
| Model 2. As model 1 + dose of antipsychotics                                    | 2544.5           | <.001***        | 23.126   | 0.150                   | 0.092                                                           |
| Model 3. As model 2 + interaction of psychiatrists by dose of antipsychotics    | 2538.0           | <.001***        | 37.749   | 0.193                   | 0.090                                                           |
| Model 4. As model 2 + type of antipsychotics                                    | 2541.6           | 0.031*          | 9.1324   | 0.162                   | 0.085                                                           |
| Model 5. As model 4 + baseline severity                                         | 2424.8           | <.001***        | 118.96   | 0.408                   | 0.039                                                           |
| Model 6. As model 5 + frequency of psychiatrist visits <sup>c</sup>             | 2420.9           | 0.016*          | 5.5886   | 0.412                   | 0.038                                                           |
| Model 7. As model 6 + treatment site                                            | 2416.7           | 0.016*          | 9.9846   | 0.423                   | 0.014                                                           |
| Model 8. As model 7 + medication non-adherence <sup>d</sup>                     | 2418.5           | 0.678           | 0.1724   | 0.422                   | 0.014                                                           |
| Model 9. As model 7 + frequency of psychologist visits                          | 2540.0           | <.001***        | 24.225   | 0.442                   | 0.013                                                           |
| Model 10. As model 9 + frequency of psychologist visits                         | 2542.8           | 0.055 .         | 3.6843   | 0.445                   | 0.014                                                           |
| Model 11. WHO-DAS 2.0 total score ~ time + gender of the patient                | 2571.0           | 0.837           | 0.0425   | 0.016                   | NA                                                              |
| Model 12. As model 11 + gender of the psychiatrist                              | 2571.4           | 0.203           | 1.621    | 0.020                   | NA                                                              |
| Model 13. As model 12 + interaction between genders of psychiatrist and patient | 2573.3           | 0.858           | 0.0322   | 0.021                   | NA                                                              |

*Note.* A square root transformation was applied to the WHO-DAS 2.0 total scores to meet the normality and homogeneity assumptions.

<sup>a</sup> Model comparison was performed by comparing the model including the last predictor, defined in the model definition, with the model excluding the last predictor.

<sup>b</sup> AIC: Akaike information criterion.

<sup>c</sup> The frequency by which patients had contact with their psychiatrist in the month before the study assessment.

<sup>d</sup> Medication adherence was measured as the number of days the participant used less or no antipsychotic drugs while these had been prescribed, in the two weeks before the study assessment.

**Table 3**

*Additional linear mixed-effects analyses on the effect of psychiatrists on Positive And Negative Syndrome Scale (PANSS) total score in first episode psychosis patients*

| Model description <sup>a</sup>                                                  | AIC <sup>b</sup> | <i>p</i> -value | $R^2_{\text{marginal}}$ | $R^2_{\text{marginal}}$ for psychiatrist as predictor per model |
|---------------------------------------------------------------------------------|------------------|-----------------|-------------------------|-----------------------------------------------------------------|
| Model 1. PANSS total score ~ time + psychiatrists                               | -5723.7          | 0.046*          | 0.092                   | 0.093                                                           |
| Model 2. As model 1 + dose of antipsychotics                                    | -5738.2          | <.001***        | 0.111                   | 0.089                                                           |
| Model 3. As model 2 + interaction of psychiatrists by dose of antipsychotics    | -5730.0          | 0.078 .         | 0.130                   | 0.072                                                           |
| Model 4. As model 2 + type of antipsychotics                                    | -5738.9          | 0.080 .         | 0.116                   | 0.085                                                           |
| Model 5. As model 2 + baseline severity                                         | -5753.7          | <.001***        | 0.172                   | 0.077                                                           |
| Model 6. As model 5 + frequency of psychiatrist visits <sup>c</sup>             | -5754.8          | 0.079 .         | 0.173                   | 0.071                                                           |
| Model 7. As model 6 + treatment site                                            | -5748.5          | 0.849           | 0.172                   | 0.016                                                           |
| Model 8. As model 6 + years of education                                        | -5763.5          | <.001***        | 0.206                   | 0.079                                                           |
| Model 9. As model 8 + medication non-adherence <sup>d</sup>                     | -5761.5          | 0.960           | 0.205                   | 0.079                                                           |
| Model 10. As model 8 + frequency of psychologist visits                         | -5774.6          | <.001***        | 0.446                   | 0.075                                                           |
| Model 11. As model 10 + frequency of psychologist visits                        | -5772.9          | 0.598           | 0.445                   | 0.075                                                           |
| Model 12. PANSS total score ~ time + gender of the patient                      | -5730.3          | 0.113           | 0.011                   | NA                                                              |
| Model 13. As model 12 + gender of the psychiatrist                              | -5729.5          | 0.273           | 0.015                   | NA                                                              |
| Model 14. As model 12 + interaction between genders of psychiatrist and patient | -5728.1          | 0.439           | 0.017                   | NA                                                              |

*Note.* A reciprocal transformation was applied to the PANSS total scores to meet the normality and homogeneity assumptions.

<sup>a</sup> Model comparison was performed by comparing the model including the last predictor, defined in the model definition, with the model excluding the last predictor.

<sup>b</sup> AIC: Akaike information criterion.

<sup>c</sup> The frequency by which patients had contact with their psychiatrist in the month before the study assessment.

<sup>d</sup> Medication adherence was measured as the number of days the participant used less or no antipsychotic drugs while these had been prescribed, in the two weeks before the study assessment.
